# Supplementary material
Source: HighWire-hosted journal article supplement (https://bmjopen.bmj.com/content/6/9/e010537)
Supplement: inline-supplementary-material-1 [file inline-supplementary-material-1.pdf]

## Appendix. Collected data in logbooks

| Item                          | Variables                                                                                                                                                                                                                                                                                                                                                                                                                                                                       |
|-------------------------------|---------------------------------------------------------------------------------------------------------------------------------------------------------------------------------------------------------------------------------------------------------------------------------------------------------------------------------------------------------------------------------------------------------------------------------------------------------------------------------|
| Patient contact information   | <ul style="list-style-type: none"> <li>- Sex</li> <li>- Age</li> <li>- Anonymous description of the patient contact, as recorded in the Electronic Medical Recording system (anamnesis, physical examination, consult evaluation, and plan)</li> <li>- Reason for encounter (ICPC code*)</li> </ul>                                                                                                                                                                             |
| Clinical query                | <ul style="list-style-type: none"> <li>- Presence of clinical query (yes/no)</li> <li>- Written description</li> <li>- Type of question (diagnosis, aetiology, prognosis, therapy)</li> </ul>                                                                                                                                                                                                                                                                                   |
| Information-seeking behaviour | <ul style="list-style-type: none"> <li>- Presence of information-seeking behaviour (yes/no)</li> <li>- Duration of search</li> <li>- If yes: Search moment (before patient consultation, during patient consultation, directly after patient consultation, later on the same day, at home, other)</li> <li>- If no: Reason (little relevance of clinical question, lack of time, pragmatic approach**, other)</li> </ul>                                                        |
| Answer to the clinical query  | <ul style="list-style-type: none"> <li>- Answer retrieved (yes/no)</li> <li>- Resource (attending GP/colleague, national GP guideline, other guideline(s), textbook, consultation of a specialist, pharmacotherapeutic guideline, PubMed, pre-appraised bibliographic databases, other)</li> <li>- Impact, according to trainee (improvement of clinical decision-making, confirmation of the decision, expanding knowledge, recall of knowledge, reassurance, none)</li> </ul> |

\* Lamberts H WM. ICPC. International Classification of Primary Care. Oxford: Oxford University Press; 1987.

\*\* Pragmatic approach: based their clinical management on the at that moment available information
